# Supplementary material for: Lipid–GPCR interactions in an asymmetric plasma membrane model
Source: Royal Society of Chemistry journal article supplement (doi:10.1039/d4fd00210e), 2025-01-01
Supplement: d4fd00210e1.pdf [file d4fd00210e1.pdf]

# Supplemental Information for Lipid-GPCR interactions in an asymmetric plasma membrane

Jingjing Ji<sup>a</sup> and Edward Lyman<sup>\*,a,b</sup>

<sup>a</sup> Department of Physics and Astronomy, University of Delaware, Newark, DE USA

<sup>b</sup> Department of Chemistry and Biochemistry, University of Delaware, Newark, DE USA

\* Corresponding author: [elyman@udel.edu](mailto:elyman@udel.edu)

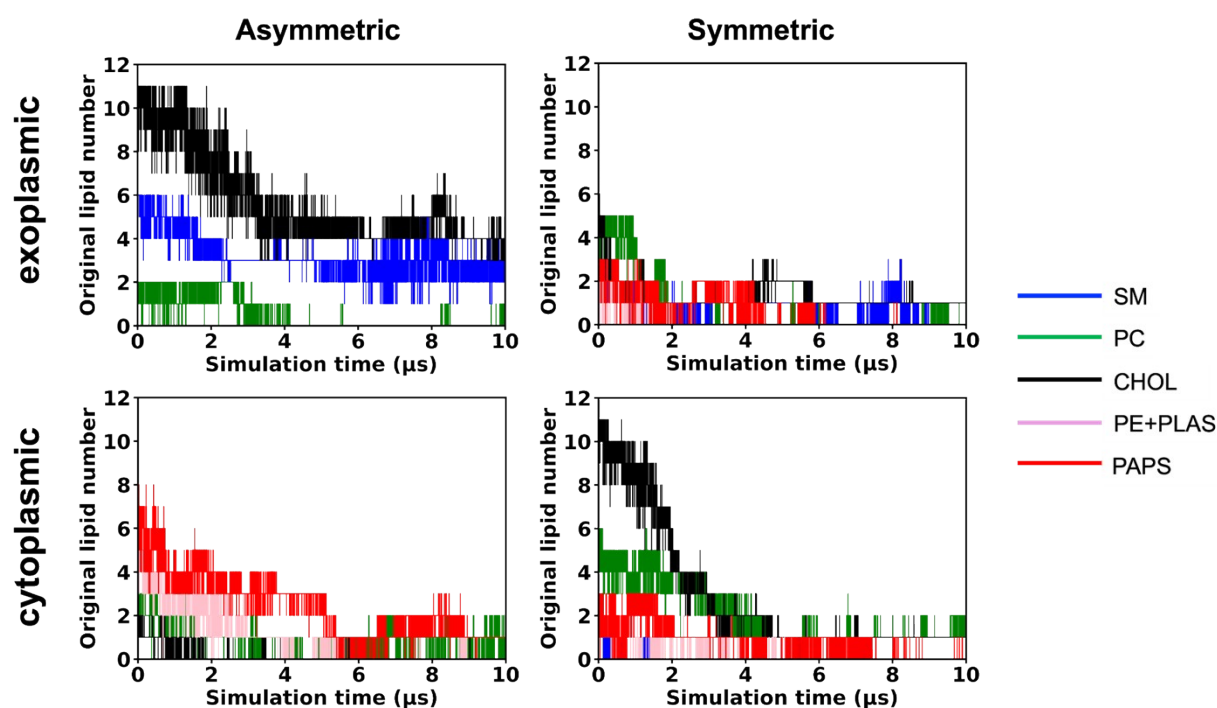

**Supplemental Figure S1** Timeseries of first-shell lipid exchanges for both leaflets in both simulation models. Each time a lipid that is initially in the first shell exchanges with a lipid that is in the second shell the corresponding data series decreases by one. If all lipids of a particular type leave the first shell the corresponding data series is equal to zero

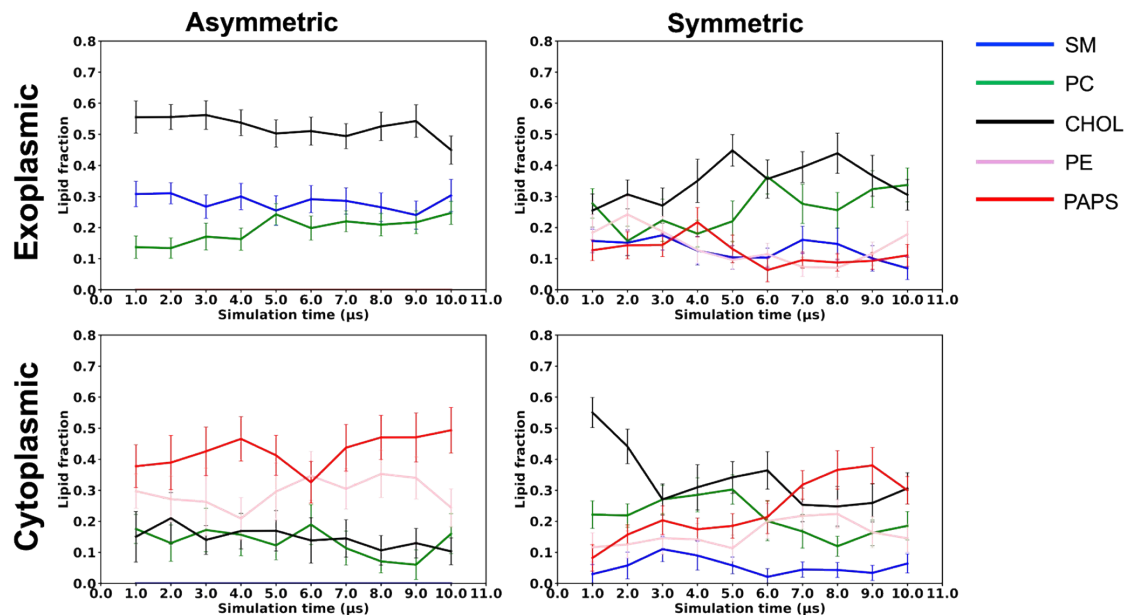

**Supplemental Figure S2** The mole fraction of each lipid class in the first solvation shell, averaged over 1  $\mu$ sec blocks of simulation time. The error bars are the standard deviation over the preceding 1  $\mu$ sec block.

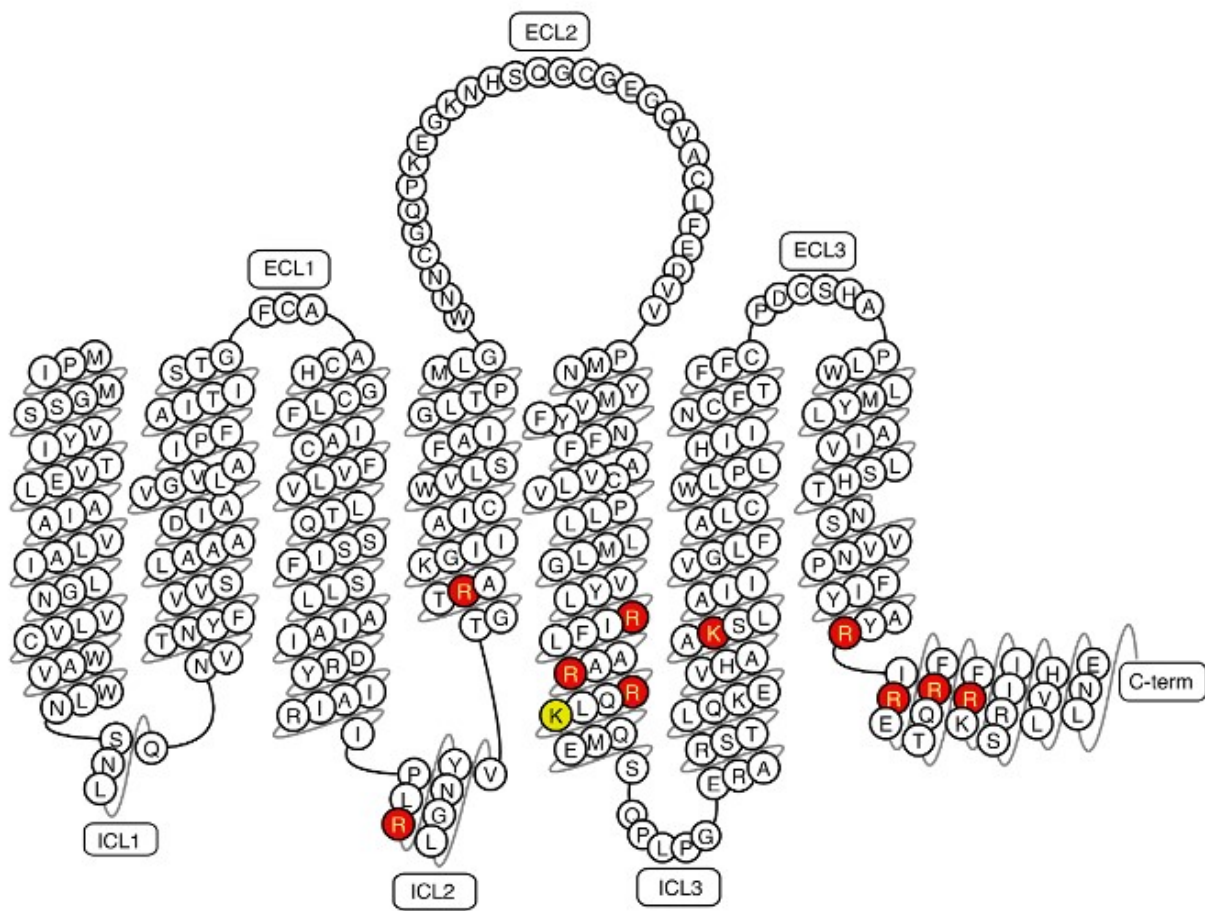

**Supplemental Figure S3** Positively charged side chains that interact with a PS headgroup at least 80% of the time in the symmetric membrane simulation (red) or at least 50% of the time (yellow).

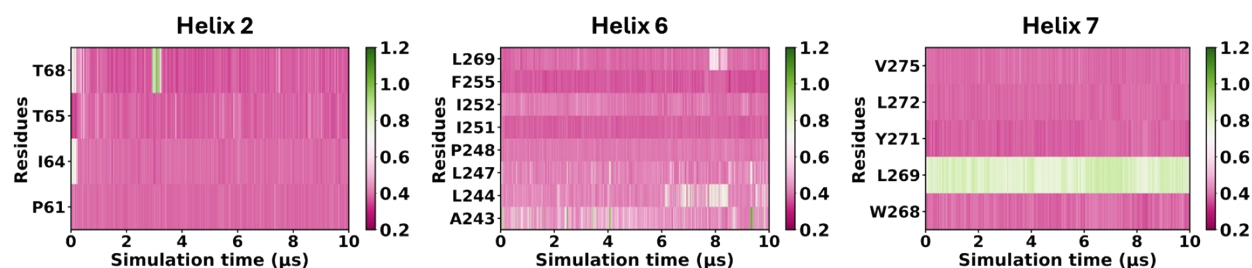

**Supplemental Figure S4** Time series of side chain-cholesterol contacts for the three bound cholesterol molecules shown in Figure 4 during the asymmetric membrane simulation. The color scale reports the shortest distance between any cholesterol and side chain heavy atom.

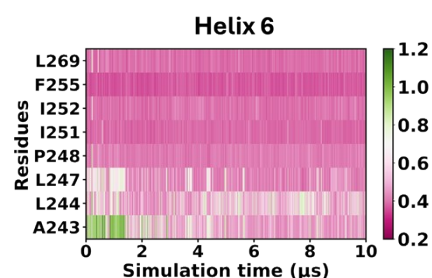

**Supplemental Figure S5** Time series of side chain-cholesterol contacts for the cholesterol bound to helix 6 in the symmetric membrane simulation. The color scale reports the shortest distance between any cholesterol and side chain heavy atom.

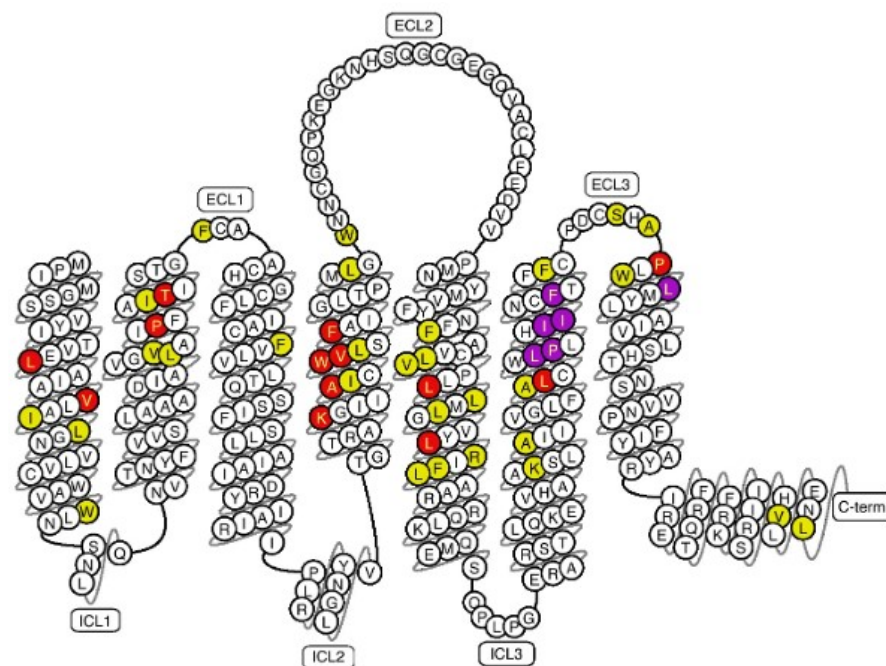

**Supplemental Figure S6** Cholesterol interactions with the receptor in the symmetric membrane simulation. Interactions are colored by residue, with purple indicating interaction with a single cholesterol for the entire duration of the simulation, red indicating interaction with any cholesterol for at least 80% of the simulation, and yellow any cholesterol for at least 50% of the simulation.
